# Supplementary material for: Gene Co-Expression Analysis Reveals the Transcriptome Changes and Hub Genes of Fructan Metabolism in Garlic under Drought Stress
Source: MDPI journal article supplement (doi:10.3390/plants12193357), 2023-09-22
Supplement: s1 [file s1]

**Table S1** Summary of sequencing data quality

| Sample | Raw Reads | Clean reads | Clean bases | Error(%) | Q20(%) | Q30(%) | GC(%) |
|--------|-----------|-------------|-------------|----------|--------|--------|-------|
| A_1    | 48882404  | 48300674    | 7.25G       | 0.03     | 97.18  | 92.18  | 44.92 |
| A_2    | 43846336  | 42986032    | 6.45G       | 0.03     | 95.24  | 93.14  | 44.41 |
| A_3    | 57210364  | 55979060    | 8.4G        | 0.03     | 95.47  | 93.45  | 44.76 |
| B_1    | 54257518  | 53353704    | 8G          | 0.03     | 94.93  | 92.76  | 44.38 |
| B_2    | 48333432  | 47773134    | 7.17G       | 0.03     | 97.08  | 92.01  | 44.48 |
| B_3    | 70107204  | 68709184    | 10.31G      | 0.03     | 96.31  | 94.35  | 45.23 |
| C_1    | 45429078  | 44870166    | 6.73G       | 0.03     | 97.14  | 92.13  | 45.16 |
| C_2    | 51137978  | 50283984    | 7.54G       | 0.03     | 97.18  | 92.23  | 44.38 |
| C_3    | 59574510  | 58446284    | 8.77G       | 0.03     | 96.33  | 94.36  | 44.31 |
| D_1    | 46570886  | 45692200    | 6.85G       | 0.03     | 95.38  | 93.34  | 45.24 |
| D_2    | 46536406  | 45590504    | 6.84G       | 0.03     | 97.15  | 92.08  | 44.65 |
| D_3    | 54457980  | 53217126    | 7.98G       | 0.03     | 95.25  | 93.18  | 44.51 |
| E_1    | 52938882  | 51914108    | 7.79G       | 0.03     | 95.41  | 93.37  | 44.34 |
| E_2    | 75908614  | 74100432    | 11.12G      | 0.03     | 94.89  | 92.73  | 46.52 |
| E_3    | 44781362  | 44144740    | 6.62G       | 0.03     | 97.11  | 92.01  | 44.16 |
| F_1    | 55636566  | 54614738    | 8.19G       | 0.03     | 96.61  | 91.04  | 44.71 |
| F_2    | 54514410  | 53578788    | 8.04G       | 0.03     | 97.58  | 93.13  | 45.46 |
| F_3    | 61489712  | 60443538    | 9.07G       | 0.03     | 97.18  | 92.12  | 45.56 |

**Table S2** List of splicing length distribution

| Nucleotides Length(bp) | Transcripts | Unigenes |
|------------------------|-------------|----------|
| 200-500                | 270,563     | 123,318  |
| 500-1000               | 150,345     | 139,092  |
| 1000-2000              | 125,279     | 123,842  |
| >2000                  | 58,731      | 58,613   |
| Total                  | 604,918     | 444,865  |
| Min Length             | 201         | 201      |
| Mean Length            | 890         | 1,094    |
| Median Length          | 574         | 818      |
| Max Length             | 14,246      | 14,246   |
| N50                    | 1,374       | 1,512    |
| N90                    | 373         | 529      |
